# Supplementary material for: Label-free fluorescence assay based on near-infrared B,N-doped carbon dots as a fluorescent probe for the detection of sialic acid
Source: Royal Society of Chemistry journal article supplement (doi:10.1039/c9nj05981d), 2020-01-01
Supplement: c9nj05981d1.pdf [file c9nj05981d1.pdf]

**Label-free fluorescence assay based on near-infrared B, N-doped  
carbon dots as a fluorescent probe for the detection of sialic acid**

**Nan Wang<sup>1</sup>, Mengke Wang<sup>1</sup>, Yang Yu<sup>2</sup>, Guojian Yang<sup>2</sup>, Xingguang Su<sup>1\*</sup>**

<sup>1</sup> *Department of Analytical Chemistry, College of Chemistry, Jilin University, Changchun 130012, China*

<sup>2</sup> *State Key Lab of Supramolecular Structure and Materials, College of Chemistry, Jilin University, Changchun, 130012, P. R. China.*

\*Corresponding author    Tel.: +86-431-85168352    E-mail address: [suxg@jlu.edu.cn](mailto:suxg@jlu.edu.cn)

## Chemicals and reagents

The chemical reagents used in the experiments are of analytical grade without further purification. The deionized water used in this experiment has a resistivity greater than  $18 \text{ M}\Omega \text{ cm}^{-1}$ . 3-Aminophenylboronic acid (APBA) (98%) and glycine were purchased from Aladdin (<http://www.aladdin-e.com>). O-phenylenediamine (OPD) (98.5%), Maltose and Galactose were purchased from Sinopharm Chemical Reagent Co. Ltd. (<https://www.sinoreagent.com>). Sialic acid (SA) was purchased from Beijing Dingguo Biotechnology Co. Ltd. (<http://www.dingguo.com>) which need to be stored at below  $20 \text{ }^\circ\text{C}$ . Hydrochloric acid, Ammonium chloride, Potassium thiocyanate, Sodium chloride, Potassium chloride, Urea, Anhydrous calcium chloride, Anhydrous sodium sulfate, Potassium dihydrogen phosphate, Sodium hydrogencarbonate were purchased from Beijing Chemical Works (<http://www.beijingchemworks.com>). This experiment used a  $10 \text{ mM}\cdot\text{L}^{-1}$  glycine buffer solution to adjust the pH of the reaction. And the configured solutions were all stored at  $4^\circ\text{C}$ .

## Instrumentation

Fluorescence spectral data were obtained from a Shimadzu RF-5301PC spectrofluorometer instrument equipped with a xenon lamp, and the data were measured using a quartz cuvette with an optical path length of 1 cm (Shimadzu Co., Kyoto, Japan, <http://www.shimadzu.com>). UV-visible absorption spectroscopy data were obtained by testing with a Varian GBC Cintra 10e UV-Vis spectrometer (Japan, <http://www.shimadzu.com>). Fourier transform infrared spectroscopy data were measured by using a Bruker IFS66V FT-IR spectrometer equipped with a DGTS detector (32 scans) (Germany, <https://www.bruker.com>). All pH measurements and the configured buffer solutions were performed using a PHS-3C pH meter (Tuopu Co., Hangzhou, China,

<http://www.lei-ci.com>). Transmission Electron Microscopy (TEM) was obtained by Hitachi H-800 electron microscope using an accelerating voltage of 300 KeV (<http://www.hitachi.com.cn/>).

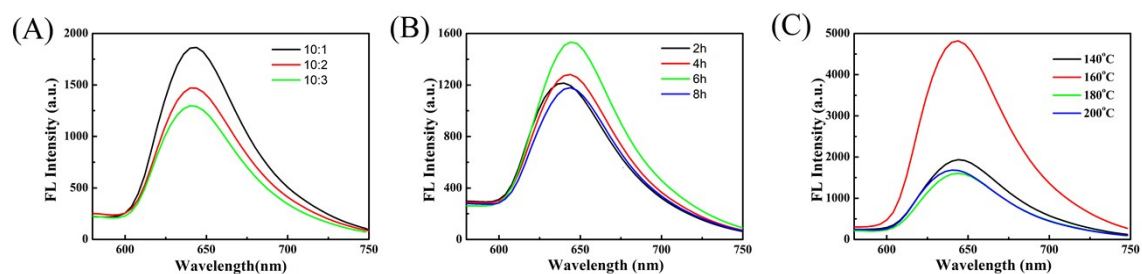

**Fig. S1** Effect of reactant ratio (A) and reaction time (B) hydrothermal temperature (C) on the fluorescence spectra of the near-infrared B, N co-doped carbon dots .

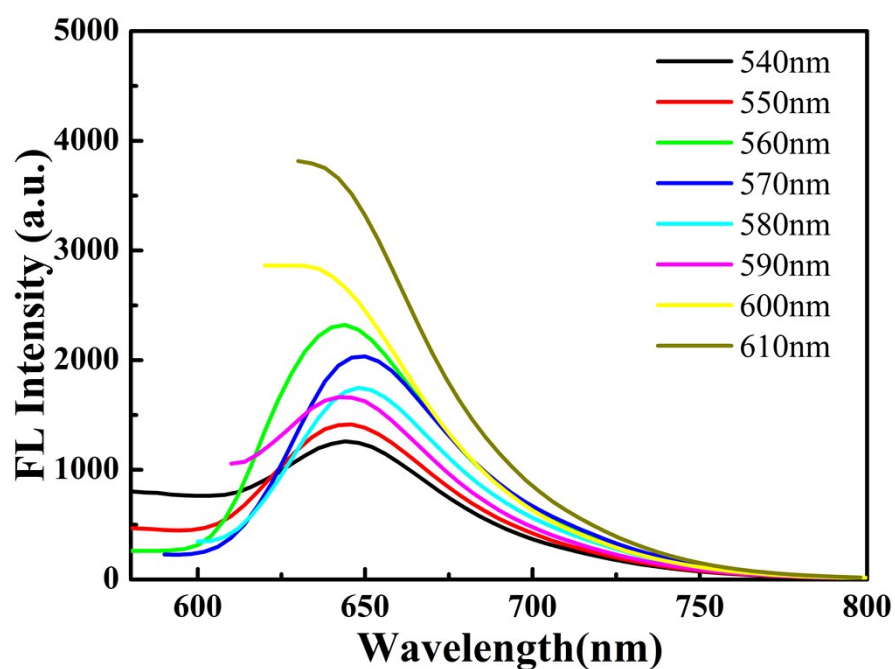

**Fig. S2** The fluorescence spectra of B, N co-doped carbon dots at various excitation wavelengths from 540 nm to 610 nm.

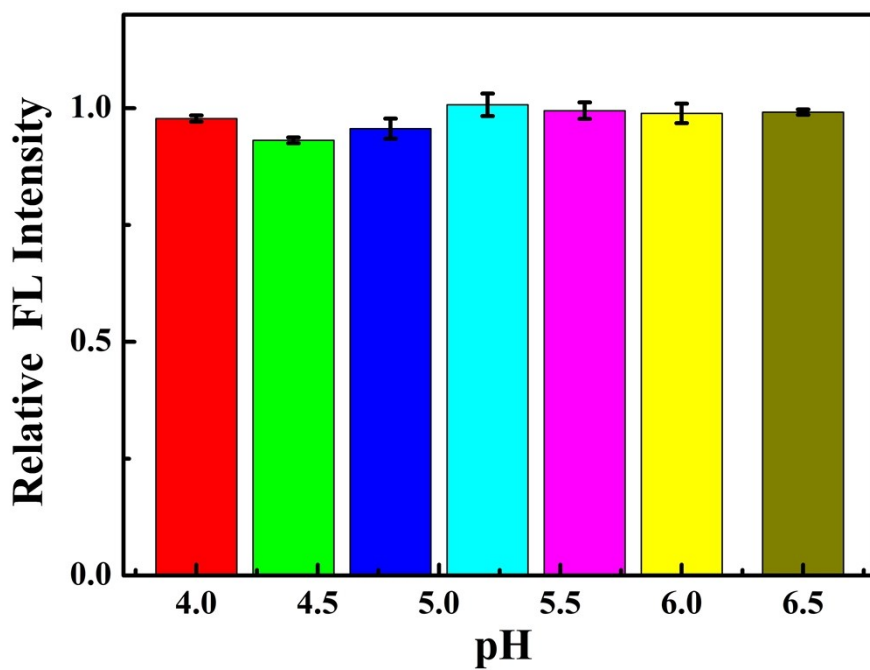

**Fig. S3** The effect of glycine buffer on the fluorescence intensity change of the CDs/ SA system.

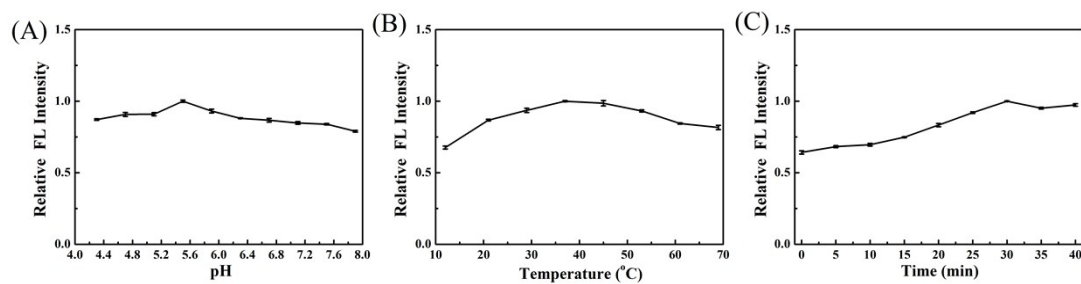

**Fig. S4** The effect of pH (A), temperature (B) and reaction time (C) on the fluorescence intensity of the CDs/ SA system.

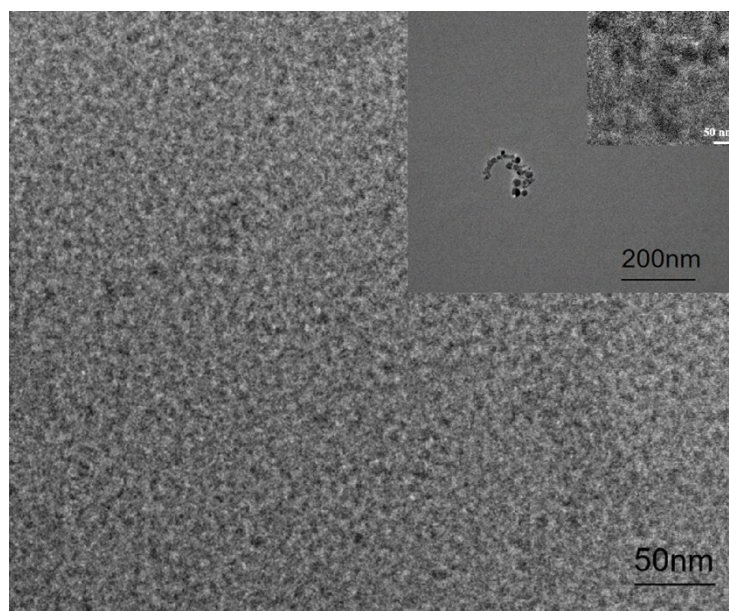

**Fig. S5** TEM image of B, N co-doped carbon dots and the B, N co-doped carbon dots /SA complex (Inset).

**Table S1. Comparison with previous methods for the detection of SA**

| Methods         | Materials                                                                   | Linear range( $\mu\text{M}$ ) | Detection limit( $\mu\text{M}$ ) | Reference |
|-----------------|-----------------------------------------------------------------------------|-------------------------------|----------------------------------|-----------|
| LC-MS           | -                                                                           | 1.40 -1000                    | 1.4                              | 1         |
| Electrochemical | porphine/graphene oxide modified electrode                                  | 100-7500                      | 28.5                             | 2         |
| Electrochemical | MWCNT electrode                                                             | 2-3000                        | 0.8                              | 3         |
| Colorimetric    | gold nanoparticles (AuNPs) modified with 3-aminophenylboronic acid (3-APBA) | 150-1000                      | 60                               | 4         |
| Colorimetric    | 4-MPBA-AuNPs                                                                | 80-2000                       | 68                               | 5         |
| Fluorescence    | Boronic acid functionalized graphene quantum dots                           | 100-10000                     | 5                                | 6         |
| Fluorescence    | NIR-CDs                                                                     | 20-1000                       | 9.24                             | This work |

## References

1. A. Tebani, D. Schlemmer, A. Imbard, O. Rigal, D. Porquet and J. F. Benoist, *J Chromatogr B*, 2011, **879**, 3694– 3699.
2. T. Liu, B. Fu, J. Chen, Z. Yan and K. Li, *Electrochimica Acta*, 2018, **269**, 136-143.
3. W. D. Zhang, B. Xu, Y. X. Hong, Y. X. Yu, J. S. Ye and J. Q. Zhang, *Journal of Solid State Electrochemistry*, 2010, **14**, 1713-1718.
4. T. J. Jayeoye, W. Cheewasedtham, C. Putson and T. Rujiralai, *Microchimica Acta*, 2018, **185**.
5. S. Sankoh, C. Thammakhet, A. Numnuama, W. Limbut, P. Kanatharana and P. Thavarungkul, *Biosens Bioelectron*, 2016, **85**, 743–750.
6. Y. Chen, L. Ding and H. Ju, *Chem Commun*, 2013, **49**, 862-864.
